# Supplementary material for: Lamin A upregulation reorganizes the genome during rod photoreceptor degeneration
Source: Cell Death Dis. 2023 Oct 25;14(10):701. doi: 10.1038/s41419-023-06224-x (PMC10600220; doi:10.1038/s41419-023-06224-x)
Supplement: Supplementary file 4 — Supplemental Table S1 [file 41419_2023_6224_MOESM4_ESM.xlsx]

## Sheet: Lamin A versus Control MAST
Gene	p_val	avg_log2FC	pct.1	pct.2	p_val_adj
mt-Co3	1.53198e-19	0.589863	0.996	0.988	1.62252e-15
mt-Nd4	3.52823e-18	0.639932	0.996	0.951	3.73675e-14
mt-Cytb	6.68121e-18	0.584145	0.993	0.972	7.07607e-14
mt-Atp6	6.12366e-17	0.560098	0.996	0.984	6.48557e-13
Hbb-bs	3.63341e-16	-2.92752	0.193	0.433	3.84815e-12
Malat1	2.66496e-15	-2.8768	0.257	0.109	2.82246e-11
mt-Nd2	7.95278e-12	0.589995	0.971	0.879	8.42279e-08
mt-Co2	1.60532e-11	0.409067	0.993	0.972	1.70019e-07
Rho	2.47368e-10	0.446846	0.996	0.968	2.61988e-06
mt-Nd5	2.29902e-09	0.805032	0.839	0.713	2.43489e-05
Gnat1	4.52205e-09	0.447889	0.996	0.943	4.7893e-05
Elob	2.26832e-08	-0.823476	0.368	0.623	0.000240237
Gnb3	3.28014e-08	-1.66171	0.079	0.259	0.0003474
mt-Nd3	2.82275e-07	0.563325	0.929	0.842	0.00298957
mt-Nd1	3.74522e-06	0.337394	0.975	0.915	0.0396657
mt-Nd4l	6.41997e-06	0.698739	0.793	0.652	0.0679939
Cox8a	2.46219e-05	-0.549729	0.607	0.769	0.26077
Ndufa6	2.91993e-05	-0.536155	0.207	0.385	0.30925
Mif	9.01803e-05	-0.961058	0.261	0.421	0.9551
Rtbdn	0.000126224	0.560381	0.821	0.757	1
Tpi1	0.000158146	-1.15597	0.204	0.332	1
Ubb	0.000172243	-0.416222	0.936	0.951	1
Cox5a	0.000190511	-0.501698	0.375	0.555	1
Rpl26	0.000196515	-0.52959	0.429	0.607	1
2010107E04Rik	0.000197526	-0.525423	0.5	0.664	1
Cst3	0.0002377	-0.312065	0.871	0.927	1
Atp5g1	0.000352809	-0.637593	0.461	0.611	1
Mrpl54	0.000357835	-0.827584	0.125	0.259	1
Cdk2ap2	0.000385265	-0.857886	0.214	0.36	1
Ndufv2	0.000388538	-0.780972	0.121	0.255	1
Gnb1	0.000395386	0.302279	0.982	0.947	1
Set	0.000574285	-0.569448	0.239	0.389	1
Sncb	0.000609324	-0.539091	0.189	0.336	1
Timm13	0.000632933	-0.936358	0.132	0.263	1
Ndufs5	0.000737748	-0.584358	0.407	0.571	1
Rpl11	0.000769844	-0.434104	0.589	0.741	1
Ndufv3	0.000820151	-0.725614	0.286	0.441	1
Uqcr10	0.000853514	-0.369933	0.254	0.401	1
Calr	0.000892465	0.907447	0.271	0.146	1
Rpl23	0.000896568	-0.345717	0.654	0.798	1
Ndufa7	0.000937541	-0.658918	0.418	0.538	1
Nedd8	0.00123424	-0.25671	0.311	0.449	1
Snrpd2	0.00128183	-0.627055	0.154	0.283	1
Elovl4	0.00142656	0.456737	0.711	0.656	1
Cox7b	0.00149469	-0.47837	0.336	0.49	1
Rpl36	0.00156289	-0.552793	0.654	0.757	1
Atp5e	0.00159948	-0.379475	0.482	0.636	1
Minos1	0.00160973	-0.70075	0.136	0.259	1
Rps28	0.00174819	-0.355856	0.689	0.818	1
H3f3a	0.00176683	-0.359742	0.932	0.96	1
Uqcr11	0.00179905	-0.677911	0.311	0.445	1
Rpl35a	0.00198237	-0.432271	0.586	0.704	1
Ndufa4	0.00213343	-0.302844	0.943	0.955	1
Cox5b	0.00217275	-0.637457	0.461	0.563	1
Atp5g2	0.00244349	-0.459968	0.364	0.514	1
Ptma	0.0025074	0.377863	0.479	0.486	1
Uqcrh	0.00323984	-0.407764	0.621	0.721	1
Ndufb4	0.00460564	-0.276607	0.296	0.421	1
Rpl41	0.00489095	-0.335235	0.846	0.903	1
Cox7a2	0.00503229	-0.4634	0.486	0.623	1
AI847159	0.00508122	-0.378711	0.389	0.53	1
Uckl1os	0.00519095	-0.555159	0.193	0.312	1
Ptp4a3	0.00555262	-0.529743	0.35	0.478	1
Rpl36al	0.00563404	-0.482217	0.157	0.271	1
Gm48551	0.00626039	-0.353295	0.361	0.498	1
Ubl5	0.00629978	-0.447414	0.504	0.64	1
Chchd10	0.00649063	-0.411646	0.611	0.729	1
Ndufb2	0.0069694	-0.435798	0.246	0.372	1
Rs1	0.00753772	0.347081	0.779	0.684	1
Psmb5	0.00799446	-0.27733	0.15	0.251	1
Slc24a1	0.0087297	0.274129	0.761	0.64	1
Scand1	0.00932074	-0.383568	0.207	0.324	1
mt-Atp8	0.00932649	0.514617	0.371	0.263	1
Rpl22l1	0.00957418	-0.2829	0.264	0.385	1
Rps21	0.0103133	-0.327843	0.775	0.846	1
Usmg5	0.0104208	-0.261159	0.371	0.49	1
Ndufa12	0.0110252	-0.255741	0.321	0.441	1
Arl6	0.0110701	-0.351331	0.35	0.478	1
Grina	0.0113638	0.650008	0.307	0.223	1
Lamtor5	0.0114251	-0.438456	0.189	0.283	1
Ndufs6	0.0116103	-0.456989	0.204	0.312	1
Gm15706	0.0117455	-0.383516	0.196	0.308	1
Tomm7	0.012611	-0.326554	0.379	0.506	1
Hagh	0.0128075	-0.610689	0.157	0.259	1
Mir124-2hg	0.0131431	-0.477246	0.425	0.543	1
Atp5k	0.0132144	-0.318235	0.439	0.567	1
Uqcrq	0.0132482	-0.348874	0.521	0.648	1
Lsm4	0.0136818	-0.775832	0.164	0.255	1
Prom1	0.0142256	0.359292	0.279	0.304	1
Drd4	0.0151599	-0.30263	0.279	0.397	1
Rps20	0.0158686	-0.273816	0.686	0.794	1
Bri3	0.0184501	-0.451939	0.171	0.271	1
Ndufa5	0.0198339	-0.373645	0.393	0.514	1
Prcd	0.0199685	-0.328014	0.714	0.802	1
Rpl18	0.0209073	-0.283709	0.386	0.506	1
Tsg101	0.0222078	-0.593651	0.204	0.308	1
Atp5j	0.025853	-0.3881	0.439	0.551	1
Ndufa13	0.0261215	-0.349193	0.389	0.506	1
Itm2b	0.028383	0.357218	0.432	0.445	1
Cox6a1	0.0286649	-0.250849	0.246	0.344	1
Rpl21	0.0293647	-0.254712	0.471	0.587	1
Mrps33	0.0297916	-0.371182	0.2	0.3	1
Cul3	0.0308758	0.397097	0.3	0.267	1
Ubc	0.0314089	-0.599025	0.3	0.381	1
Atp5j2	0.0319821	-0.268933	0.514	0.628	1
Rps23	0.0322371	-0.308714	0.8	0.838	1
Dync1i2	0.0330311	0.296181	0.296	0.308	1
Cox17	0.0348921	-0.300622	0.189	0.283	1
Sumo2	0.0350199	-0.375761	0.454	0.53	1
Atp5a1	0.037185	-0.722091	0.289	0.377	1
Aipl1	0.0376814	0.363573	0.464	0.49	1
Atp1b2	0.0376854	0.49272	0.532	0.474	1
Myl6	0.0381108	-0.54745	0.261	0.348	1
Sec61g	0.0391127	-0.377662	0.207	0.304	1
Sod2	0.0392866	-0.273836	0.225	0.32	1
Rpl3	0.0403361	-0.280924	0.6	0.704	1
Rps24	0.0407909	-0.332188	0.825	0.87	1
Rps10	0.0408082	-0.349874	0.632	0.684	1
Gpx4	0.0416076	-0.323751	0.886	0.911	1
Cnga1	0.0456255	0.259387	0.932	0.891	1
Impg2	0.0460486	0.466117	0.375	0.316	1
Ndufc1	0.0480516	-0.434124	0.379	0.466	1
Hint1	0.0495806	-0.550697	0.321	0.421	1
Rsrc2	0.0498602	0.340041	0.261	0.239	1
Slc6a6	0.0509923	0.374928	0.668	0.632	1
Btf3	0.0515905	-0.300409	0.354	0.457	1
Eif1	0.0562212	-0.299195	0.846	0.883	1
Cirbp	0.0586492	-0.347071	0.325	0.425	1
Atp5g3	0.0611006	-0.36709	0.361	0.462	1
Tmsb4x	0.0628864	-0.570689	0.471	0.559	1
Calm2	0.0633217	-0.257699	0.293	0.389	1
Aldoa	0.0643687	-0.262168	0.904	0.919	1
Hmgn2	0.0675954	-0.304671	0.371	0.47	1
Atp5d	0.0721109	-0.427231	0.221	0.308	1
Wdr89	0.0727286	-0.449526	0.268	0.344	1
Higd1a	0.0753554	-0.540292	0.193	0.275	1
Rps26	0.0761541	-0.264141	0.521	0.619	1
Dctn3	0.078419	-0.470911	0.236	0.324	1
Pde6a	0.0784765	0.304756	0.704	0.632	1
Tax1bp1	0.080859	-0.415732	0.329	0.421	1
Cox7c	0.082405	-0.295238	0.55	0.644	1
Hsp90b1	0.0834389	0.475407	0.414	0.368	1
Cops9	0.0837087	-0.324084	0.346	0.441	1
Ppia	0.0839773	-0.431438	0.354	0.429	1
Lbhd1	0.0894988	0.336788	0.264	0.251	1
Psmd8	0.09353	-0.613293	0.196	0.267	1
Rdh12	0.0940367	0.495868	0.336	0.263	1
Rpl13a	0.0962964	-0.390926	0.236	0.32	1
Tmem59	0.0971129	0.389423	0.382	0.312	1
Psma3	0.0974948	-0.319353	0.243	0.324	1
Ccdc126	0.100525	0.381946	0.454	0.372	1
Ybx1	0.100828	0.360814	0.654	0.656	1
Rpl32	0.101804	-0.318737	0.589	0.676	1
Ssu72	0.103589	-0.256213	0.407	0.498	1
Fam169a	0.106131	0.459771	0.325	0.263	1
Rpl4	0.118834	0.305998	0.296	0.296	1
Samd11	0.123754	-0.429218	0.2	0.275	1
Clu	0.127292	-0.380617	0.35	0.433	1
Dstn	0.131422	0.353505	0.289	0.263	1
Chmp2a	0.148133	0.264284	0.286	0.267	1
Pde6b	0.148206	0.338846	0.714	0.652	1
Rbp3	0.158113	0.273272	0.771	0.725	1
Ap2m1	0.158668	0.371523	0.282	0.219	1
Ndufa11	0.161659	-0.294966	0.254	0.328	1
Cnot6	0.165542	0.338864	0.282	0.235	1
Cdhr1	0.168109	0.353151	0.389	0.377	1
Grcc10	0.168182	-0.259341	0.257	0.332	1
Atp5l	0.168314	-0.254237	0.561	0.64	1
Rps19	0.172744	-0.310997	0.514	0.591	1
Rpl39	0.176295	-0.279172	0.743	0.789	1
Gm20594	0.17958	0.27249	0.589	0.543	1
Naca	0.180287	-0.319444	0.482	0.563	1
Nol7	0.185045	-0.442569	0.279	0.348	1
Eloc	0.187938	-0.327108	0.186	0.251	1
Aes	0.188682	-0.250574	0.282	0.356	1
Abca4	0.191021	0.352431	0.389	0.336	1
Trappc6b	0.201423	-0.318299	0.232	0.3	1
Ndufa2	0.209107	-0.313109	0.379	0.453	1
Tuba1b	0.20995	0.350488	0.279	0.235	1
Guk1	0.216512	-0.302829	0.518	0.583	1
Mpc2	0.216802	-0.465389	0.3	0.356	1
Hmgb2	0.21751	0.293535	0.321	0.304	1
Eif4g2	0.21863	0.254699	0.464	0.449	1
Ndufs2	0.22219	-0.445399	0.246	0.308	1
Mfge8	0.225803	-0.283017	0.189	0.251	1
Cngb1	0.226534	0.262801	0.571	0.498	1
Pde6d	0.228472	0.264152	0.261	0.198	1
Pcmtd2	0.231103	0.252087	0.539	0.47	1
Cox7a2l	0.233648	-0.447811	0.214	0.255	1
Ndufb3	0.235985	-0.271055	0.361	0.429	1
Eef2	0.240815	-0.309669	0.221	0.283	1
Rpl12	0.244828	-0.269652	0.304	0.372	1
Tmbim6	0.264127	0.402938	0.293	0.251	1
H2afv	0.273394	0.281402	0.393	0.389	1
Rufy3	0.278357	0.282719	0.361	0.308	1
Rplp0	0.282743	-0.403901	0.336	0.401	1
Eno1	0.290642	-0.268619	0.654	0.684	1
Tmem258	0.291147	-0.264521	0.225	0.283	1
Neurod1	0.294506	-0.311927	0.443	0.506	1
Ndufab1	0.305486	-0.289808	0.225	0.283	1
Fam3c	0.315875	0.273388	0.5	0.462	1
Pla2g7	0.324713	0.297694	0.364	0.316	1
Gm42418	0.336694	0.378093	0.6	0.603	1
Cds1	0.346308	0.338756	0.257	0.231	1
Top2b	0.353348	0.348827	0.271	0.259	1
Tpd52	0.356155	-0.259978	0.25	0.287	1
Nr2e3	0.375808	0.274591	0.7	0.656	1
Timm8b	0.3763	-0.281515	0.304	0.36	1
Cplx4	0.385871	0.266769	0.721	0.684	1
1700020I14Rik	0.400454	0.34933	0.314	0.271	1
Sf3b6	0.401072	-0.391421	0.214	0.263	1
Sub1	0.408149	-0.301416	0.207	0.255	1
Dmd	0.428483	-0.517573	0.243	0.287	1
Tnrc6b	0.461917	0.42205	0.261	0.215	1
Selenow	0.464147	-0.335087	0.339	0.356	1
Atp6ap2	0.46809	0.265042	0.271	0.239	1
Ube2e3	0.468462	-0.478281	0.221	0.267	1
Tnfsf12	0.514404	-0.258607	0.279	0.324	1
Nadk2	0.532548	0.315941	0.25	0.219	1
Hspa5	0.614953	0.251045	0.279	0.271	1
Son	0.677124	-0.336306	0.264	0.279	1

## Sheet: Lbr versus Control MAST
Gene	p_val	avg_log2FC	pct.1	pct.2	p_val_adj
Lbr	2.45e-09	2.77915	0.343	0.012	2.6e-05
Ap2a2	3.39e-06	-2.09881	0	0.296	0.0359146
Gm3550	6.3e-05	1.07065	0.429	0.109	0.666916
Glo1	6.79e-05	1.34853	0.686	0.324	0.719247
Rps2	0.00015386	0.905272	0.686	0.587	1
Rpl39	0.00029419	0.898983	0.914	0.789	1
Fam57b	0.00043348	-1.80791	0.2	0.526	1
Hbb-bs	0.0007123	-3.08629	0.171	0.433	1
Mgarp	0.00092427	-0.906974	0.429	0.749	1
Gzmm	0.00100867	0.842025	0.257	0.053	1
Guca1a	0.00144369	-0.908001	0.829	0.915	1
Cd59a	0.00357093	-0.912833	0.057	0.275	1
Hk2	0.00426648	-1.05651	0.114	0.368	1
Cbx3	0.00482424	-0.516449	0.257	0.514	1
Cd47	0.00547548	1.5254	0.343	0.126	1
Stub1	0.00855541	1.23667	0.286	0.089	1
Dmd	0.00858252	-2.0815	0.086	0.287	1
Ppa1	0.0112138	-0.696028	0.114	0.34	1
Edf1	0.0117296	-1.21355	0.086	0.304	1
Rps24	0.0131167	0.312351	1	0.87	1
Eif4g2	0.0137028	-0.963997	0.2	0.449	1
Uqcrq	0.0190751	-0.874683	0.4	0.648	1
Atp5e	0.0190783	0.812008	0.743	0.636	1
Suds3	0.0228664	0.946409	0.257	0.085	1
Sec62	0.0233673	-0.72962	0.114	0.32	1
Cst3	0.023552	-0.426575	0.8	0.927	1
mt-Atp6	0.0254235	0.30182	0.943	0.984	1
Rps8	0.0254877	0.477713	0.886	0.895	1
Pde6b	0.0259116	-0.941984	0.429	0.652	1
Kif1b	0.0259656	-0.609998	0.086	0.255	1
Rpl13	0.0269733	0.562086	0.743	0.781	1
Gnb3	0.0276073	0.707979	0.486	0.259	1
Rho	0.0285423	-0.369776	0.943	0.968	1
Hsp90aa1	0.0314138	-0.478013	0.657	0.85	1
Cabp4	0.0331676	-0.852186	0.114	0.312	1
Rp1	0.0335907	-0.785993	0.6	0.725	1
Mir124-2hg	0.0356694	-0.930153	0.314	0.543	1
Timm10b	0.0376896	1.06073	0.286	0.117	1
Rbm7	0.0380018	-1.07467	0.086	0.263	1
Vtn	0.0382047	-0.579468	0.571	0.769	1
Ddx5	0.0402398	-0.799291	0.4	0.615	1
Gpi1	0.0411732	0.421195	0.257	0.385	1
Dync1i2	0.0423761	0.632492	0.2	0.308	1
Ndufb9	0.042879	0.816412	0.714	0.514	1
Slc25a33	0.043465	-0.603616	0.2	0.405	1
mt-Co1	0.045154	-0.301258	0.914	0.968	1
Pkig	0.0463419	1.06023	0.343	0.17	1
Rpl37a	0.0480679	0.461123	0.857	0.838	1
Rps14	0.0486642	0.873835	0.714	0.619	1
Rps25	0.0512871	0.6441	0.8	0.68	1
Rpl41	0.0525159	0.523416	0.914	0.903	1
Nrl	0.0531543	-0.326591	0.6	0.794	1
Eif1ax	0.0534812	1.05814	0.257	0.101	1
Rack1	0.053674	0.409847	0.371	0.474	1
Cnga1	0.0561538	-0.616642	0.8	0.891	1
Trappc2l	0.0565426	0.737133	0.286	0.121	1
Icmt	0.0588105	1.06982	0.286	0.13	1
Rpl34	0.058897	0.353295	0.857	0.672	1
Bex2	0.0602324	1.13773	0.371	0.194	1
Chchd10	0.0645241	-0.69841	0.629	0.729	1
Spint2	0.0652448	0.885356	0.286	0.138	1
Sec61g	0.0658731	1.09854	0.457	0.304	1
Rpl7	0.0676609	0.535046	0.771	0.66	1
Rpl27-ps3	0.0699703	0.480248	0.4	0.437	1
Prph2	0.0700665	-0.350474	0.914	0.976	1
Ss18l2	0.0703961	1.06977	0.257	0.231	1
Xiap	0.0705087	-0.454909	0.2	0.385	1
Vamp2	0.0712302	-1.15035	0.143	0.312	1
Pde6a	0.0732639	-0.781214	0.486	0.632	1
Fmc1	0.0745149	1.34536	0.286	0.142	1
Calm2	0.0749464	-0.719236	0.2	0.389	1
Sgk1	0.0777217	-0.877753	0.2	0.389	1
Gm11361	0.0777474	0.744991	0.657	0.486	1
Fundc2	0.0785511	0.931807	0.371	0.198	1
Scand1	0.0851823	0.526406	0.514	0.324	1
Fam169a	0.086565	-0.453217	0.114	0.263	1
Bicdl1	0.0878053	0.620205	0.257	0.113	1
Chchd2	0.0878611	0.416189	0.829	0.798	1
Hist1h1c	0.0886971	-1.35402	0.114	0.251	1
Impg1	0.0896706	-0.837604	0.114	0.271	1
Rps15a	0.0926679	0.425096	0.771	0.692	1
Elob	0.0933958	-0.596615	0.429	0.623	1
Tomm7	0.0945077	0.732973	0.657	0.506	1
Cox6c	0.0957384	0.481534	0.857	0.802	1
Reep6	0.0963165	-0.490783	0.314	0.506	1
Grtp1	0.0965309	-0.548615	0.114	0.271	1
Rpl10-ps3	0.0986438	0.925966	0.4	0.3	1
Atp5a1	0.099404	-1.18313	0.2	0.377	1
Gm10260	0.0995104	0.611577	0.314	0.158	1
Pdc	0.100838	-0.273226	0.943	0.988	1
Msi2	0.101269	-0.760818	0.286	0.47	1
Ndufc1	0.10612	0.30319	0.629	0.466	1
Casz1	0.10753	-0.463462	0.114	0.255	1
Atp5j2	0.107641	0.329379	0.8	0.628	1
Ssu72	0.108187	0.429673	0.686	0.498	1
Calm1	0.113676	-0.487917	0.257	0.417	1
Cisd1	0.113706	0.86629	0.371	0.291	1
Sf3b6	0.115933	-1.06715	0.114	0.263	1
Gnb1	0.118266	-0.438844	0.943	0.947	1
Eef2	0.121001	0.660868	0.429	0.283	1
Cirbp	0.122573	-0.836258	0.257	0.425	1
Sncb	0.122969	0.820133	0.486	0.336	1
Rps3a1	0.126587	0.578163	0.6	0.68	1
Snx3	0.126663	0.843938	0.314	0.17	1
Elovl4	0.128465	0.688243	0.686	0.656	1
Rgs9	0.131701	-0.800114	0.171	0.332	1
Rps3	0.131728	0.571783	0.8	0.688	1
Snap25	0.132958	-0.837524	0.257	0.421	1
mt-Nd5	0.13445	0.496915	0.686	0.713	1
Drd4	0.135638	-0.792363	0.229	0.397	1
Hypk	0.137029	0.569789	0.543	0.457	1
Gtf2h5	0.137153	0.741228	0.314	0.166	1
Usmg5	0.139241	0.640745	0.629	0.49	1
Hmgb1	0.139746	-0.845154	0.286	0.433	1
Rpl10a	0.14038	0.521767	0.714	0.753	1
Agtpbp1	0.140487	1.00308	0.286	0.17	1
Spcs2	0.146368	-0.795667	0.143	0.291	1
Psenen	0.147638	0.964108	0.257	0.126	1
Pmvk	0.148524	0.678408	0.257	0.126	1
Ndufb4	0.152122	-0.408882	0.257	0.421	1
Gm10076	0.152864	0.648478	0.371	0.235	1
Bbip1	0.154419	0.768571	0.257	0.13	1
Hspa8	0.155569	0.294645	0.686	0.518	1
Camta1	0.156005	0.646473	0.343	0.198	1
Ptma	0.157328	0.489371	0.429	0.486	1
Got1	0.158318	1.08874	0.314	0.231	1
Lbhd1	0.158431	-0.546875	0.114	0.251	1
Rpl28	0.159533	0.493818	0.829	0.761	1
Rps21	0.16003	0.366743	0.914	0.846	1
Cox7c	0.160485	0.681408	0.714	0.644	1
Crx	0.161055	-0.356456	0.2	0.356	1
Tax1bp1	0.163989	-0.773654	0.257	0.421	1
Stx3	0.165278	-0.567633	0.4	0.563	1
Rpl8	0.16775	0.557682	0.829	0.733	1
Prmt1	0.174421	0.686808	0.257	0.13	1
Pde6g	0.176888	-0.278935	1	0.984	1
Hmgb2	0.177162	0.556899	0.314	0.304	1
Rer1	0.178605	0.742298	0.286	0.174	1
Ptp4a3	0.181117	-0.253192	0.343	0.478	1
Polr2k	0.181155	0.824414	0.257	0.15	1
Rpn1	0.182698	0.587247	0.257	0.134	1
Psma2	0.184212	0.599714	0.286	0.263	1
Fau	0.189546	0.571072	0.943	0.858	1
Epb41l2	0.19432	-0.327852	0.2	0.344	1
Rps4x	0.198763	-0.2764	0.486	0.644	1
Syp	0.199193	0.483358	0.4	0.251	1
Ndufb7	0.200404	0.666959	0.514	0.389	1
Rplp2	0.201483	0.461544	0.771	0.656	1
Pgam1	0.203415	-0.437803	0.543	0.692	1
Cox8a	0.20393	0.512835	0.829	0.769	1
Gnb5	0.21005	0.290365	0.286	0.32	1
Mlf1	0.210602	0.639438	0.286	0.158	1
Pfdn5	0.211307	0.523811	0.6	0.559	1
Ppib	0.2123	0.840272	0.286	0.198	1
Guk1	0.212534	-0.305275	0.629	0.583	1
mt-Nd2	0.217821	0.306289	0.943	0.879	1
Ubc	0.221866	-0.799472	0.314	0.381	1
Grina	0.223383	0.824925	0.257	0.223	1
Rpl31	0.223531	0.642536	0.371	0.324	1
Btf3	0.224956	-0.686571	0.314	0.457	1
Atp5k	0.225441	0.42347	0.686	0.567	1
Ap2m1	0.226247	0.834184	0.257	0.219	1
Vapa	0.229828	0.624266	0.314	0.194	1
Gm17018	0.233755	0.647029	0.314	0.19	1
Ndufv3	0.236404	0.379466	0.429	0.441	1
H3f3b	0.239979	-0.358242	0.8	0.85	1
Tmem258	0.240447	0.549365	0.286	0.283	1
Atp6v1g1	0.241267	-0.442868	0.257	0.401	1
Hsp90b1	0.246259	-0.672603	0.229	0.368	1
Tmem237	0.247165	-0.270681	0.2	0.32	1
Srp14	0.24743	0.747052	0.371	0.312	1
Ebpl	0.254749	-0.510457	0.486	0.615	1
Rpl18	0.257923	0.635064	0.571	0.506	1
Cox4i1	0.258797	0.417756	0.714	0.717	1
Hnrnpk	0.260078	0.611657	0.371	0.34	1
Tomm20	0.262036	0.39765	0.657	0.611	1
Ndufb10	0.265634	0.831648	0.314	0.271	1
Polr2l	0.266246	0.441764	0.229	0.255	1
Rpl24	0.266289	0.506013	0.8	0.729	1
Rtn4	0.269955	-0.632331	0.543	0.619	1
Nr2e3	0.270753	-0.304138	0.514	0.656	1
Pcsk1n	0.27205	0.299474	0.314	0.389	1
Mdh1	0.273494	0.778399	0.457	0.421	1
Slc24a1	0.273555	-0.498437	0.571	0.64	1
Rpl36	0.275181	-0.25157	0.629	0.757	1
Hk1	0.278071	-0.479427	0.171	0.287	1
Psmb2	0.278983	0.676016	0.286	0.174	1
Rpsa	0.279323	0.547422	0.8	0.696	1
Epb41	0.283052	0.548871	0.257	0.259	1
Clu	0.28773	0.612128	0.514	0.433	1
Minos1	0.289448	-0.785585	0.143	0.259	1
Mif	0.290997	-0.543325	0.286	0.421	1
Psma7	0.302347	-0.531899	0.171	0.287	1
Ndufv2	0.305157	-0.80431	0.143	0.255	1
Snu13	0.308804	0.684925	0.286	0.178	1
Rpl36a	0.313632	0.440178	0.429	0.316	1
Rpl29	0.315133	0.470262	0.286	0.174	1
Naca	0.316647	-0.636999	0.429	0.563	1
Rom1	0.318021	-0.263351	0.943	0.98	1
Ctsb	0.32242	0.415938	0.286	0.178	1
Hist1h2bc	0.326632	0.366865	0.686	0.656	1
Ddt	0.32788	0.659663	0.286	0.227	1
Ube2e3	0.328304	-0.915901	0.286	0.267	1
Zfp706	0.332851	0.427367	0.257	0.154	1
2023-03-01	0.338168	1.00643	0.257	0.17	1
Nxnl2	0.3394	-0.523894	0.343	0.474	1
Fbxo9	0.342282	0.647633	0.257	0.223	1
Lamtor5	0.342607	0.52348	0.371	0.283	1
Agpat3	0.343814	-0.31093	0.543	0.668	1
Rpl14	0.344491	0.282024	0.543	0.518	1
Fam104a	0.3463	0.488442	0.286	0.178	1
AI847159	0.347167	-0.263263	0.571	0.53	1
Hcn1	0.347542	-0.786538	0.343	0.381	1
H2afz	0.349199	-0.609797	0.2	0.316	1
Eif3f	0.350797	-0.801702	0.229	0.316	1
Gm48551	0.354514	-0.477585	0.371	0.498	1
Cplx4	0.356314	-0.399092	0.571	0.684	1
Son	0.356722	-0.663743	0.171	0.279	1
Rps17	0.357646	0.345279	0.714	0.591	1
Laptm4b	0.358953	-0.357053	0.343	0.466	1
1110004F10Rik	0.359539	0.552495	0.257	0.162	1
Atp5f1	0.360518	-0.419374	0.343	0.462	1
Cox5a	0.364749	0.45501	0.571	0.555	1
Ppia	0.365345	0.389643	0.514	0.429	1
Scg5	0.369095	0.355505	0.6	0.494	1
Grcc10	0.369338	0.461288	0.4	0.332	1
Ndufb2	0.369778	-0.384163	0.257	0.372	1
Polr2j	0.371287	0.594366	0.257	0.166	1
Hspe1	0.375156	0.602363	0.286	0.182	1
Cdhr1	0.375231	0.614935	0.4	0.377	1
Dctn3	0.381331	0.438011	0.371	0.324	1
Rheb	0.382145	0.532132	0.286	0.182	1
Impg2	0.382249	0.544714	0.4	0.316	1
Purb	0.384573	0.581458	0.429	0.433	1
Ndufa12	0.391278	0.484245	0.486	0.441	1
Guca1b	0.393817	-0.352361	0.657	0.704	1
Eif1	0.394323	0.265887	0.914	0.883	1
Gm9493	0.394713	0.424493	0.429	0.34	1
Rps27rt	0.403833	0.259439	0.714	0.741	1
Chmp5	0.40607	-0.433677	0.171	0.267	1
Atp5l	0.407019	0.416119	0.686	0.64	1
Pfdn1	0.407329	0.65382	0.257	0.19	1
Ndufb3	0.412088	0.350046	0.486	0.429	1
mt-Nd4	0.41421	0.251418	0.971	0.951	1
Trir	0.414415	1.08113	0.257	0.186	1
Fabp12	0.415494	-0.433129	0.429	0.381	1
Dynll1	0.415899	0.522158	0.714	0.611	1
Mien1	0.419439	0.585683	0.343	0.247	1
mt-Atp8	0.423488	0.554207	0.371	0.263	1
Gabarap	0.429904	0.290318	0.257	0.166	1
Osbp2	0.431414	-0.719188	0.171	0.259	1
Hprt	0.436005	0.545579	0.371	0.267	1
Chmp2a	0.438508	0.266639	0.2	0.267	1
Gm42418	0.438798	-0.754226	0.6	0.603	1
Bri3	0.444268	0.431345	0.371	0.271	1
Rps20	0.444861	-0.284439	0.771	0.794	1
Rabac1	0.444882	-0.455964	0.171	0.267	1
Selenof	0.445331	0.419533	0.371	0.381	1
Thoc7	0.447937	0.323338	0.286	0.19	1
Cwc15	0.448813	0.616526	0.257	0.174	1
Atp5g3	0.448867	-0.452284	0.4	0.462	1
Eno1	0.449145	-0.449222	0.629	0.684	1
Psmb6	0.450853	-0.313466	0.2	0.3	1
Eef1g	0.459859	0.484154	0.257	0.194	1
Ost4	0.465663	0.337843	0.257	0.34	1
Clcn3	0.467186	-0.550238	0.286	0.296	1
Anp32a	0.4837	-0.310222	0.486	0.482	1
Lsm4	0.485967	-0.38646	0.286	0.255	1
Emc6	0.492958	0.359631	0.257	0.174	1
Pfdn2	0.498635	-0.663582	0.171	0.259	1
Set	0.500414	-0.598774	0.343	0.389	1
Rps10	0.501963	0.334447	0.743	0.684	1
Ndufc2	0.507823	-0.629195	0.286	0.36	1
Pnrc1	0.50891	0.579825	0.286	0.198	1
Tpd52	0.513971	-0.351128	0.2	0.287	1
Samd11	0.515497	0.286073	0.371	0.275	1
Actr10	0.520307	0.295813	0.257	0.174	1
H2afv	0.521695	0.437652	0.429	0.389	1
Eid1	0.523237	0.508674	0.229	0.271	1
Tulp1	0.526835	-0.417944	0.657	0.745	1
Ftl1	0.529583	-0.605449	0.257	0.316	1
Coa3	0.529896	0.547497	0.257	0.194	1
Scp2	0.530941	-0.424618	0.171	0.255	1
BC031181	0.532977	-0.464353	0.171	0.255	1
Nol7	0.543636	-0.394721	0.257	0.348	1
Actb	0.549965	0.573707	0.514	0.482	1
Gm8797	0.550599	0.307955	0.629	0.615	1
Cox7a2l	0.558816	0.294545	0.343	0.255	1
Pcbp2	0.56599	0.478281	0.657	0.648	1
Nap1l1	0.56686	-0.665537	0.314	0.377	1
Ndufab1	0.567314	0.334684	0.314	0.283	1
Zfp385a	0.567419	-0.289557	0.371	0.377	1
Uqcc2	0.571293	0.433306	0.314	0.231	1
Rpl36al	0.571732	-0.451341	0.257	0.271	1
Eif5a	0.571941	-0.588323	0.2	0.271	1
Ndufs6	0.574378	-0.374645	0.229	0.312	1
Trappc6b	0.577363	-0.35377	0.314	0.3	1
Mpc2	0.580261	-0.272486	0.286	0.356	1
Rpl6	0.5826	0.385777	0.771	0.7	1
Uckl1os	0.588885	-0.368006	0.229	0.312	1
Rps26	0.590063	0.292366	0.629	0.619	1
Arl6	0.601882	0.339818	0.543	0.478	1
Pcmtd2	0.603486	-0.473721	0.4	0.47	1
A930003A15Rik	0.60928	-0.286984	0.514	0.603	1
Timm13	0.611299	0.261315	0.343	0.263	1
Rsrp1	0.614411	-0.698084	0.229	0.304	1
Gm11808	0.617614	0.384746	0.829	0.81	1
Mdh2	0.620805	0.469537	0.343	0.291	1
Gm10036	0.623356	0.357299	0.343	0.279	1
Rpl23a	0.63456	0.35097	0.343	0.352	1
Park7	0.636406	0.277022	0.486	0.526	1
Mlf2	0.636687	-0.424862	0.229	0.275	1
Prdx2	0.637918	-0.351738	0.4	0.437	1
Tecr	0.645496	0.250015	0.4	0.352	1
Cnbp	0.646543	-0.328293	0.2	0.271	1
Dstn	0.648317	-0.542463	0.2	0.263	1
Clstn1	0.655194	-0.363225	0.2	0.271	1
Tmbim6	0.65745	0.566902	0.257	0.251	1
Selenok	0.660113	0.309831	0.457	0.437	1
Cox6b1	0.661689	0.32079	0.6	0.551	1
Taldo1	0.663143	0.270034	0.286	0.219	1
Ubb	0.665727	-0.256509	0.943	0.951	1
Selenow	0.667061	-0.533939	0.343	0.356	1
Ndufs2	0.667535	0.557375	0.314	0.308	1
Ldha	0.670794	0.411814	0.743	0.676	1
Hspa5	0.681187	0.482105	0.343	0.271	1
Ppa2	0.681739	0.482923	0.314	0.251	1
Uqcr11	0.684631	-0.295072	0.371	0.445	1
Atp6v0b	0.686547	0.292572	0.4	0.381	1
Rsrc2	0.692496	0.747793	0.286	0.239	1
Mrps33	0.694776	-0.479729	0.286	0.3	1
Higd1a	0.695966	0.251457	0.343	0.275	1
1110051M20Rik	0.702391	0.560587	0.257	0.198	1
Timm8b	0.703297	-0.486599	0.343	0.36	1
Syt1	0.706324	-0.255532	0.286	0.356	1
Rbm39	0.711036	-0.550919	0.314	0.304	1
Smdt1	0.715957	0.455502	0.457	0.405	1
Mef2c	0.718656	-0.48431	0.229	0.287	1
Hagh	0.722271	-0.285911	0.2	0.259	1
Rpl12	0.736614	-0.274495	0.4	0.372	1
Fkbp3	0.737113	-0.442471	0.257	0.279	1
Mrfap1	0.745624	-0.336426	0.286	0.344	1
Hnrnpa1	0.747601	-0.299939	0.2	0.255	1
Rpl13a	0.748355	-0.29543	0.257	0.32	1
Sys1	0.750332	0.370992	0.286	0.227	1
Arl3	0.756952	0.347042	0.629	0.571	1
Snrpf	0.773067	-0.275816	0.2	0.251	1
Pomp	0.792725	0.414298	0.314	0.271	1
Itm2b	0.797392	0.268187	0.486	0.445	1
Dnajb6	0.808445	-0.487625	0.229	0.279	1
Cox7b	0.810817	-0.494874	0.457	0.49	1
Tpi1	0.817044	-0.541128	0.286	0.332	1
Hint1	0.833652	-0.515526	0.371	0.421	1
Cox7a2	0.881585	-0.312983	0.6	0.623	1
St13	0.887483	0.42119	0.343	0.304	1
Tspan7	0.889367	-0.325332	0.229	0.259	1
Psmd8	0.922719	0.267829	0.286	0.267	1
1700020I14Rik	0.9251	0.433793	0.257	0.271	1
Hnrnpu	0.965684	-0.271031	0.343	0.36	1
Prnp	0.972735	-0.297149	0.371	0.377	1
Rps6	0.998392	-0.251325	0.486	0.482	1
